# Supplementary material
Source: PubMed Central journal article supplement (PMC6368389)
Supplement: NIHMS852063-supplement-supplemental_data.pdf [file NIHMS852063-supplement-supplemental_data.pdf]

## Supplemental Fig. 1. Synthesis of AJI-214 and AJI-100

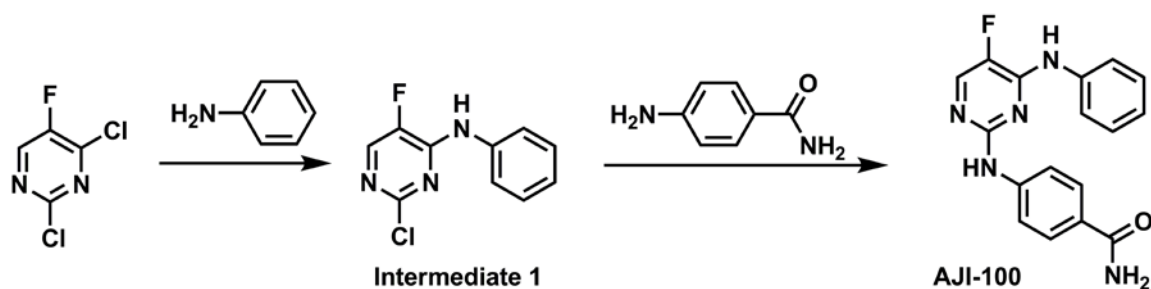

The bisanilinopyrimidine **AJI-214** was prepared using the method we have previously reported(30). The bisanilinopyrimidine **AJI-100** was prepared using the two step route we have used to prepare other 2,4-dianilinopyrimidines. Reaction of 2,4-dichloro-5-fluoropyrimidine with aniline provided the **intermediate 1**. **Intermediate 1** was reacted further with 4-aminobenzamide to give the required **AJI-100**, with HPLC purity > 99%.

**2-Chloro-5-fluoro-N-phenylpyrimidin-4-amine (intermediate 1):** To a solution of 5-fluoro-2,4-dichloropyrimidine (2.00 g, 11.98 mmol) and diethylisopropylamine (2.50 mL, 14.37 mmol) in isopropanol (12 mL) was added aniline (1.09 mL, 11.98 mmol). The mixture was stirred at reflux for 1 h. The reaction mixture was concentrated under reduced pressure. The residue was dissolved in dichloromethane (20 mL) and washed with water (10 mL) and brine (10 mL). The organic layer was dried (Na<sub>2</sub>SO<sub>4</sub>) and concentrated under reduced pressure. The resulting solid was triturated using EtOAc/hexanes to give the title compound as a white solid (1.35 g, 50%). Mp: 135-136 °C. <sup>1</sup>H NMR (400 MHz, DMSO-*d*<sub>6</sub>): δ 9.99 (s, 1H, disappeared on D<sub>2</sub>O shake), 8.30 (d, *J* = 3.5 Hz, 1H), 7.66 (d, *J* = 8.0 Hz, 2H), 7.37 (t, *J* = 8.0 Hz, 2H), 7.13 (t, *J* = 8.0 Hz, 1H). <sup>19</sup>F NMR (376 MHz, DMSO-*d*<sub>6</sub>): δ -153.7 (s). HPLC-MS (ESI+): *m/z* 226.1 [40%, (M<sup>37</sup>Cl+H)<sup>+</sup>], 224.1 [100%, (M<sup>35</sup>Cl+H)<sup>+</sup>].

**5-Fluoro-N<sup>4</sup>-phenyl-N<sup>2</sup>-[4-(4-carboxamide)phenyl]pyrimidine-2,4-diamine (AJI-100):** A mixture of **intermediate 1** (1.00 g, 4.47 mmol), 4-aminobenzamide (0.609 g, 4.47 mmol), and methanol (4.5 mL) was heated at 100 °C for 14 h. The reaction mixture was cooled to room temperature and the precipitate filtered and washed with MeOH (2 × 10 mL). The resulting solid was sonicated in saturated sodium bicarbonate solution (10 mL) for 2 min, then filtered, washed with water (3 × 20 mL), MeOH (2 × 10 mL), and dried to give **AJI-100** as a white solid (1.07 g, 74%). Mp: 248-249 °C. HPLC: 99.9% [*t*<sub>R</sub> = 10.9 min, 50% MeOH, 50% water (with 0.1% TFA), 20 min]. <sup>1</sup>H NMR (400 MHz, DMSO-*d*<sub>6</sub>): δ 9.51 (s, 1H, disappeared on D<sub>2</sub>O shake), 9.44 (s, 1H, disappeared on D<sub>2</sub>O shake), 8.14 (d, *J* = 3.7 Hz, 1H), 7.77 (brs, 1H, disappeared on D<sub>2</sub>O shake), 7.76 (d, *J* = 7.8 Hz, 2H), 7.72 (s, 4H), 7.36 (t, *J* = 7.8 Hz, 2H), 7.12 (brs, 1H, disappeared on D<sub>2</sub>O shake), 7.10 (t, *J* = 7.8 Hz, 1H). <sup>19</sup>F NMR (376 MHz, DMSO-*d*<sub>6</sub>): δ -163.2 (s). HPLC-MS (ESI+): *m/z* 324.2 [100%, (M+H)<sup>+</sup>]. LC-MS (ESI+): 992.3 [20%, (3M+Na)<sup>+</sup>], 669.2 [50%, (2M+Na)<sup>+</sup>], 346.1 [30%, (M+Na)<sup>+</sup>], 324.1 [100%, (M+H)<sup>+</sup>]. HRMS (ESI+): *m/z* calcd for C<sub>17</sub>H<sub>14</sub>FN<sub>5</sub>O (M+H)<sup>+</sup> 324.1255, found 324.1262.

| Kinases         | AJI-100 (IC50 in nM) | Staurosporine (IC50 in nM) |
|-----------------|----------------------|----------------------------|
| AMPK(A1/B2/G1)  | 0.4                  | 0.062                      |
| <b>Aurora A</b> | <b>12.7</b>          | 1.7                        |
| <b>JAK2</b>     | <b>18.5</b>          | 0.16                       |
| ARK5/NUAK1      | 21.9                 | 1.1                        |
| Aurora B        | 40                   | 8.33                       |
| MLK1/MAP3K9     | 50.1                 | 1.32                       |
| MLK3/MAP3K11    | 81.6                 | 4.45                       |
| MINK/MINK1      | 134                  | 0.53                       |
| DYRK2           | 168                  | 164                        |
| KDR/VEGFR2      | 197                  | 10.3                       |
| MELK            | 215                  | 0.94                       |
| YES/YES1        | 223                  | 1.82                       |
| c-Src           | 270                  | 2.55                       |
| CLK2            | 296                  | 8.37                       |
| PIM3            | 305                  | 0.15                       |
| TRKA            | 397                  | 3.29                       |
| IGF1R           | 408                  | 33.3                       |
| TAK1            | 411                  | 50.4                       |
| MST2/STK3       | 514                  | 5.53                       |
| DYRK3           | 555                  | 39.7                       |
| MLCK/MYLK       | 564                  | 56.6                       |
| GLK/MAP4K3      | 575                  | 0.13                       |

**Supplemental Fig. 2. AJI-100 kinase target screen.** The selectivity of AJI-100 (250nM) was first tested against a panel of 140 kinase targets at the International Centre for Kinase Profiling (ICKP, <http://www.kinase-screen.mrc.ac.uk/>). The IC<sub>50</sub> values for the top 22 targets were then measured (using the Reaction Biology Hotspot assay) for AJI-100 and compared against the nonselective control compound, staurosporine. This screen shows AJI-100 selectively inhibits Aurora kinase A and JAK2 (both bold and highlighted) at low nanomolar concentrations. The majority of off-target kinases suppressed by AJI-100 have IC<sub>50</sub> values well above 100nM, further demonstrating the selectivity of AJI-100. (Note: the Aurora kinase A IC<sub>50</sub> for alisertib is 1.2nM (Aurora A:B = 1:27)(27,31), and the JAK2 IC<sub>50</sub> for TG101348 is 3nM(26). The Aurora kinase A and JAK2 IC<sub>50</sub> values for AJI-214 are 5.7nM and 33.4nM, respectively)(28).

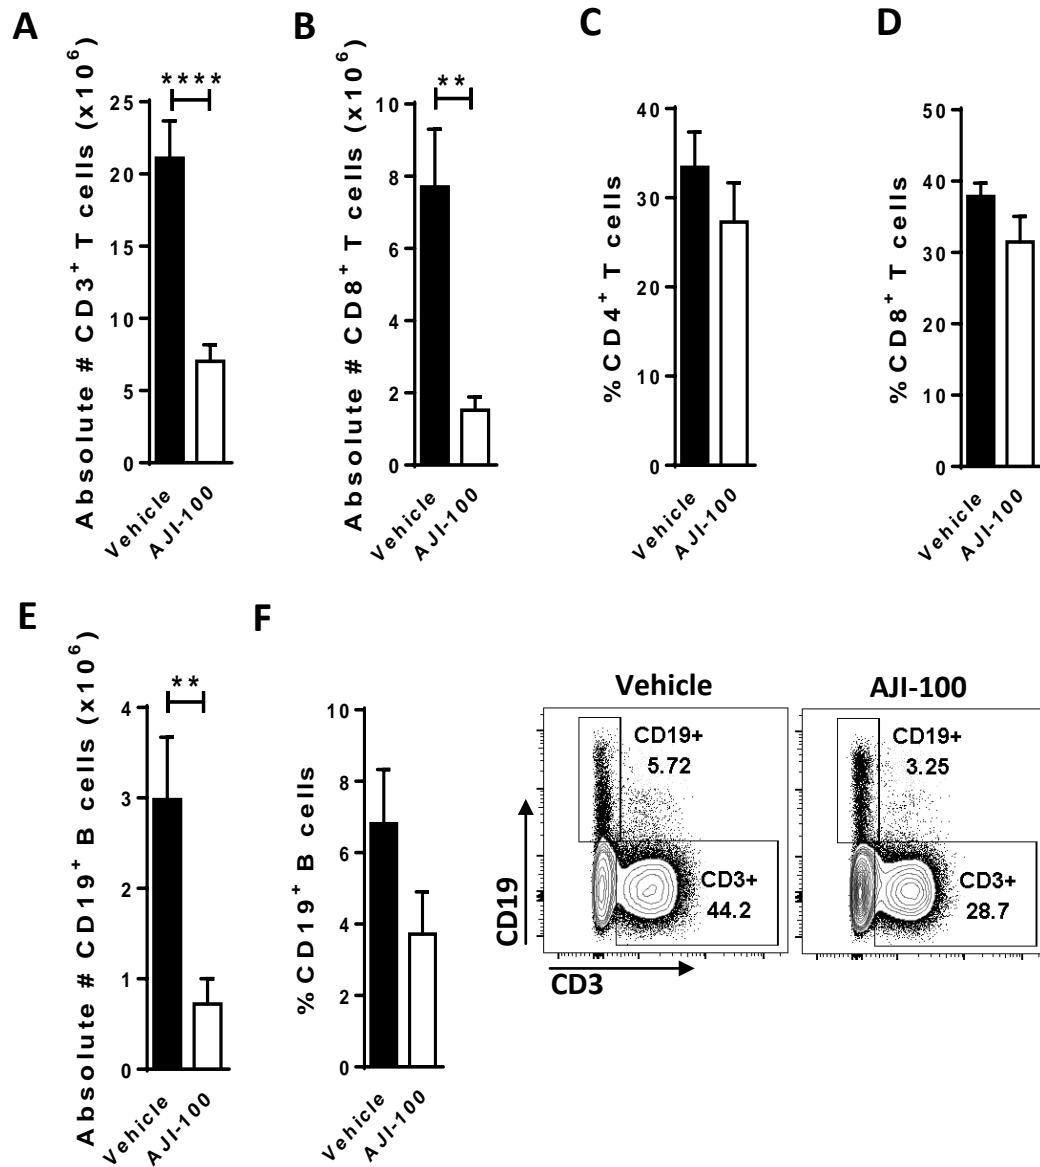

**Supplemental Fig. 3. Effects of AJI-100 on immune reconstitution.** NSG mice received  $30 \times 10^6$  human PBMCs and were then treated with AJI-100 (50mg/kg daily) or vehicle from day 0 to day +14. Recipient spleens were harvested and tissue-resident T cells were evaluated. **A-D)** AJI-100 significantly reduces the total number of T cells in the spleen, but the percentages of CD4<sup>+</sup> and CD8<sup>+</sup> subsets are similar to vehicle. **E,F)** AJI-100 significantly suppresses B cell engraftment, but the proportion of T cells to B cells in the spleen is similar to vehicle. Pooled data from at least 2 independent experiments. n=6-14 mice per each group. Mann-Whitney. \*\*P=.001-.01, \*\*\*\*P<.0001.
